# Supplementary material for: Ginsenoside Rg1 Alleviates Lipopolysaccharide-Induced Fibrosis of Endometrial Epithelial Cells in Dairy Cows by Inhibiting Reactive Oxygen Species-Activated NLRP3
Source: MDPI journal article supplement (doi:10.3390/ani13233723), 2023-12-01
Supplement: s1 [file s1]

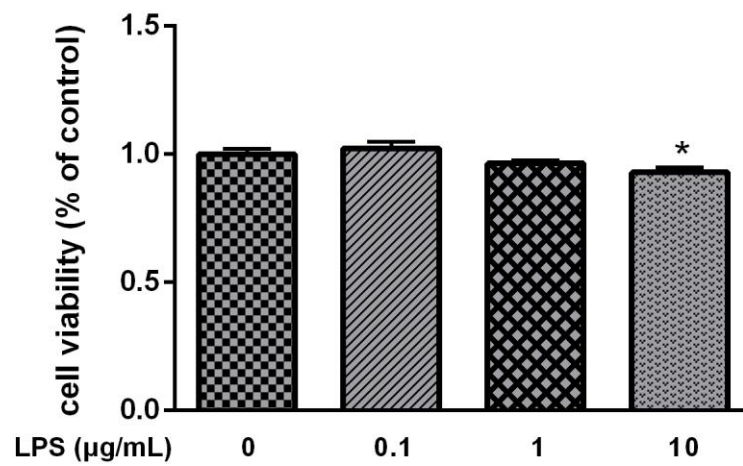

**Figure S1.** The viability of BEND cells. BEND cells undergo 48 h of processing using LPS (0.1, 1 and 10 µg/mL), the viability of BEND cells was determined using a CCK-8, the optical density (OD) values were measured at a wavelength of 450 nm. The mean  $\pm$  SEM is adopted to express values; \*  $p < 0.05$  vs. control group.
